# Supplementary material
Source: PubMed Central journal article supplement (PMC2672879)

**Supplemental Table 1. *Slc* genes not detected in brain ( $\hat{E}=0$ )**

| Gene Symbol    | Protein Name         | Substrates                                                | Gene Symbol     | Protein Name | Substrates                                                                                                  |
|----------------|----------------------|-----------------------------------------------------------|-----------------|--------------|-------------------------------------------------------------------------------------------------------------|
| <i>Slc1a7</i>  | EAAT5                | L-Glu, D/L-Asp                                            | <i>Slc06c1</i>  | Oatp6c1      | Taurocholate, T3, T4, DHEAS                                                                                 |
| <i>Slc2a2</i>  | GLUT2                | Glucose, galactose, mannose, glucosamine, fructose        | <i>Slc22a12</i> | hURAT1       | Urate                                                                                                       |
| <i>Slc5a4a</i> | SGLT3a               | Na <sup>+</sup> (H <sup>+</sup> )                         | <i>Slc22a13</i> | OCTL1        | unknown                                                                                                     |
| <i>Slc5a4b</i> | SGLT3b               | Na <sup>+</sup> (H <sup>+</sup> )                         | <i>Slc22a14</i> | OCTL2        | unknown                                                                                                     |
| <i>Slc5a8</i>  | SMCT1                | short-chain fatty acids/lactate/nicotinate, iodide        | <i>Slc22a15</i> | FLIPT1       | unknown                                                                                                     |
| <i>Slc5a12</i> | SMCT2                | short-chain fatty acids/lactate/nicotinate                | <i>Slc22a16</i> | hCT2         | Carnitine                                                                                                   |
| <i>Slc6a14</i> | ATB(O <sup>+</sup> ) | neutral, cationic amino acids                             | <i>Slc23a3</i>  | SVCT3        | L-Ascorbic acid                                                                                             |
| <i>Slc6a18</i> | Xtrp2                | unknown                                                   | <i>Slc25a24</i> | APC1         | ATP, ADP, AMP, and Pi                                                                                       |
| <i>Slc7a7</i>  | y+LAT1               | cationic and large neutral L-amino acids                  | <i>Slc25a31</i> |              | unknown                                                                                                     |
| <i>Slc7a12</i> | xCT                  | small neutral L-amino acids                               | <i>Slc25a32</i> | MFTC         | folate                                                                                                      |
| <i>Slc7a13</i> | AGT-1                | L-Asp, L-Glu                                              | <i>Slc25a34</i> |              | unknown                                                                                                     |
| <i>Slc9a10</i> |                      | monovalent cation/H <sup>+</sup>                          | <i>Slc26a3</i>  | PAT3         | SO <sub>4</sub> <sup>2-</sup> , Cl <sup>-</sup> , HCO <sub>3</sub> <sup>-</sup> , OH <sup>-</sup> , oxalate |
| <i>Slc10a1</i> | NTCP                 | Bile acids                                                | <i>Slc26a5</i>  |              | unknown                                                                                                     |
| <i>Slc10a5</i> | P5                   | unknown                                                   | <i>Slc27a2</i>  | FATP2        | Long-chain fatty acids                                                                                      |
| <i>Slc10a6</i> | P6                   | estrone-3-sulfate, dehydroepiandroster-one sulfate        | <i>Slc27a6</i>  | FATP6        | Long-chain fatty acids                                                                                      |
| <i>Slc11a1</i> | NRAMP1               | divalent metal cations                                    | <i>Slc28a1</i>  | CNT1         | Pyrimidine nucleosides, adenosine                                                                           |
| <i>Slc13a1</i> | NaS1                 | Sulfate, selenate, thiosulfate                            | <i>Slc30a4</i>  | ZNT4         | zinc                                                                                                        |
| <i>Slc15a1</i> | PEPT1                | Di- and tri-peptides/H <sup>+</sup>                       | <i>Slc30a6</i>  | ZNT6         | zinc                                                                                                        |
| <i>Slc16a3</i> | MCT4                 | Lactate, pyruvate, ketones                                | <i>Slc30a10</i> | ZNT10        | unknown                                                                                                     |
| <i>Slc16a5</i> | MCT6                 | unknown                                                   | <i>Slc34a3</i>  | NaPi-1lc     | inorganic phosphate                                                                                         |
| <i>Slc16a8</i> | MCT3                 | Lactate                                                   | <i>Slc35d2</i>  |              | unknown                                                                                                     |
| <i>Slc17a2</i> | NPT1                 | unknown                                                   | <i>Slc35e4</i>  |              | unknown                                                                                                     |
| <i>Slc17a3</i> | NPT3                 | unknown                                                   | <i>Slc36a3</i>  | PAT3         | unknown                                                                                                     |
| <i>Slc18a1</i> | VMAT1                | Serotonin, dopamine, noradrenaline, adrenaline, histamine | <i>Slc44a3</i>  | CTL3         | unknown                                                                                                     |
| <i>Slc19a3</i> | ThTr2                | Thiamine                                                  | <i>Slc44a4</i>  | CTL34        | unknown                                                                                                     |
| <i>Slc01a1</i> | Oatp1a1              | Bile salts, organic anions, organic cations               | <i>Slc45a2</i>  |              | unknown                                                                                                     |
| <i>Slc04c1</i> | Oatp4c1              | T3, cAMP                                                  | <i>Slc47a2</i>  |              | organic cations                                                                                             |
| <i>Slc06b1</i> | Oatp6b1              | Taurocholate, T3, T4, DHEAS                               |                 |              |                                                                                                             |

## Legends to Supplemental Figures

**Supplemental Figure 1. Expression pattern, gene and protein name, and cell type annotation of *Slc* genes in cluster IA.** Abbreviations for brain regions are: "OB" olfactory bulb; "CTX" cerebral cortex; "PAL" pallidum; "STR" striatum; "DG" dentate gyrus; "CA3" CA3 hippocampal field; "CA2" CA2 hippocampal field; "CA1" CA1 hippocampal field; "RHF" retrohippocampal formation; "CP" choroid plexus; "T" thalamus; "HY" hypothalamus; "COL" colliculi; "SN" substantia nigra; "VTA" ventral tegmental area; "LC" locus coeruleus; "R" raphe; "P" pons; "MED" medulla; "CB" cerebellum. Abbreviations for cells types are: A, astrocytes; G, glial cells; N, neuron; O, oligodendrocytes; I, interneurons; C, choroid plexus; BMV, brain microvessels; BG, Bergmann glial cells.

**Supplemental Figure 2. Expression pattern, gene and protein name, and cell type annotation of *Slc* genes in cluster IB.** Abbreviations for brain regions are: "OB" olfactory bulb; "CTX" cerebral cortex; "PAL" pallidum; "STR" striatum; "DG" dentate gyrus; "CA3" CA3 hippocampal field; "CA2" CA2 hippocampal field; "CA1" CA1 hippocampal field; "RHF" retrohippocampal formation; "CP" choroid plexus; "T" thalamus; "HY" hypothalamus; "COL" colliculi; "SN" substantia nigra; "VTA" ventral tegmental area; "LC" locus coeruleus; "R" raphe; "P" pons; "MED" medulla; "CB" cerebellum. Abbreviations for cells types are: A, astrocytes; G, glial cells; N, neuron; O, oligodendrocytes; I, interneurons; C, choroid plexus; BMV, brain microvessels; BG, Bergmann glial cells.

**Supplemental Figure 3. Expression pattern, gene and protein name, and cell type annotation of *Slc* genes in cluster IIA and IIB.** Abbreviations for brain regions are: "OB" olfactory bulb; "CTX" cerebral cortex; "PAL" pallidum; "STR" striatum; "DG" dentate gyrus; "CA3" CA3 hippocampal field; "CA2" CA2 hippocampal field; "CA1" CA1 hippocampal field; "RHF" retrohippocampal formation; "CP" choroid plexus; "T" thalamus; "HY" hypothalamus; "COL" colliculi; "SN" substantia nigra; "VTA" ventral tegmental area; "LC" locus coeruleus; "R" raphe; "P" pons; "MED" medulla; "CB" cerebellum. Abbreviations for cells types are: A, astrocytes; G, glial cells; N, neuron; O, oligodendrocytes; I, interneurons; C, choroid plexus; BMV, brain microvessels; BG, Bergmann glial cells.

**Supplemental Figure 4. Expression pattern, gene and protein name, and cell type annotation of *Slc* genes in cluster IIC.** Abbreviations for brain regions are: "OB" olfactory bulb; "CTX" cerebral cortex; "PAL" pallidum; "STR" striatum; "DG" dentate gyrus; "CA3" CA3 hippocampal field; "CA2" CA2 hippocampal field; "CA1" CA1 hippocampal field; "RHF" retrohippocampal formation; "CP" choroid plexus; "T" thalamus; "HY" hypothalamus; "COL" colliculi; "SN" substantia nigra; "VTA" ventral tegmental area; "LC" locus coeruleus; "R" raphe; "P" pons; "MED" medulla; "CB" cerebellum. Abbreviations for cells types are: A, astrocytes; G, glial cells; N, neuron; O, oligodendrocytes; I, interneurons; C, choroid plexus; BMV, brain microvessels; BG, Bergmann glial cells; U, all cell types.

Supplemental Fig. 1

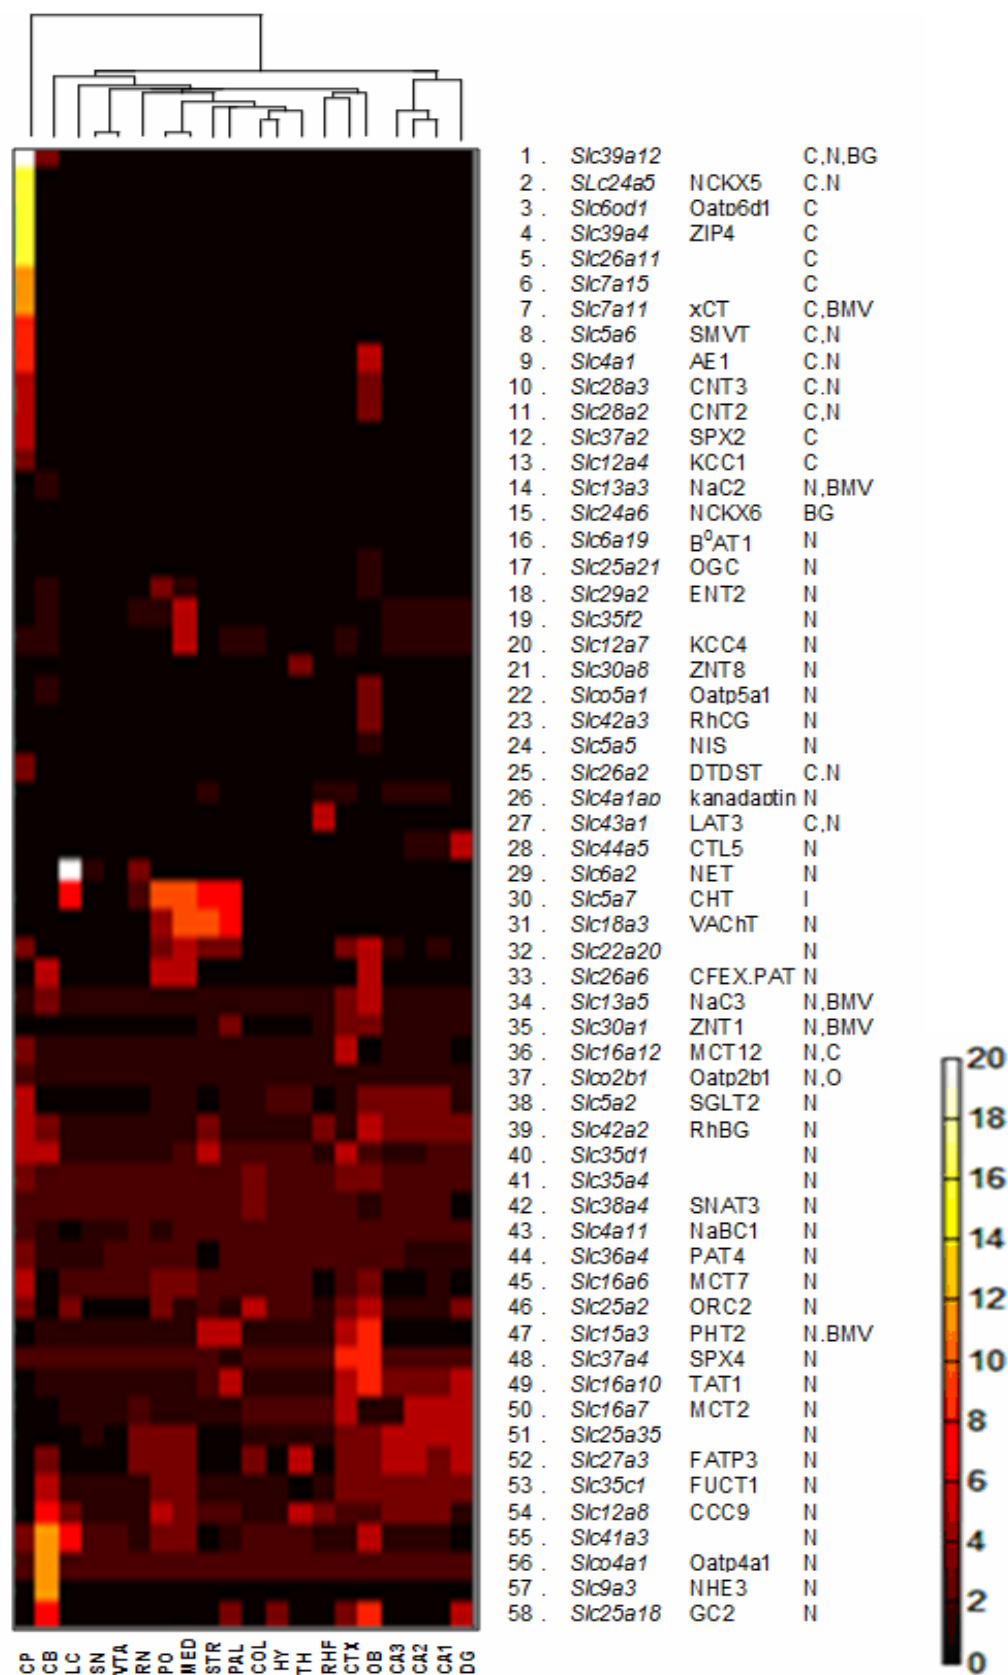

Supplemental Fig. 2

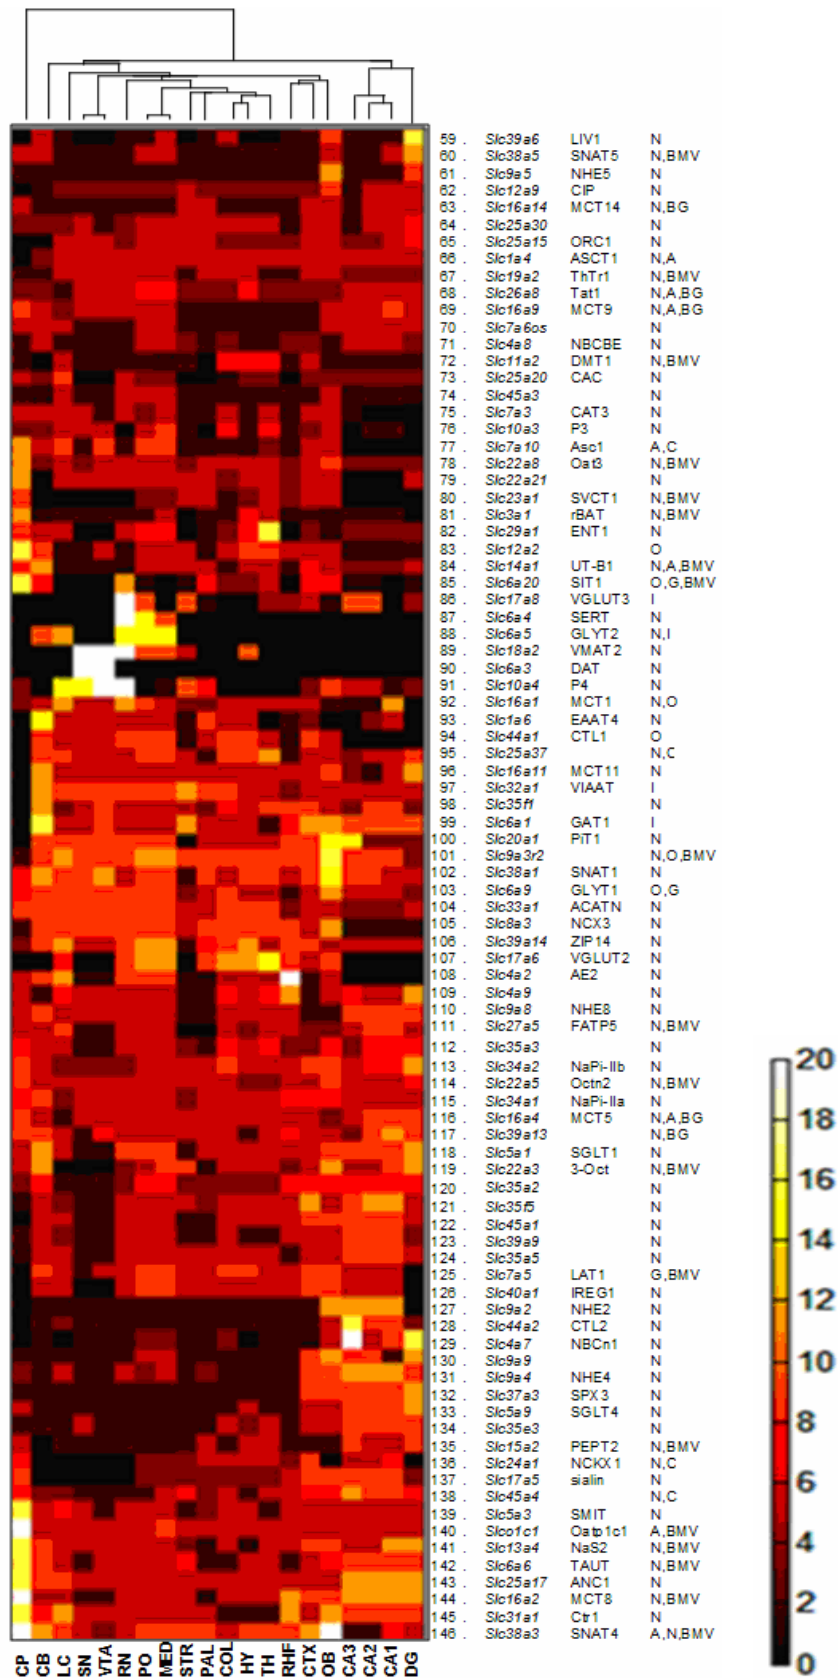

Supplemental Fig. 3

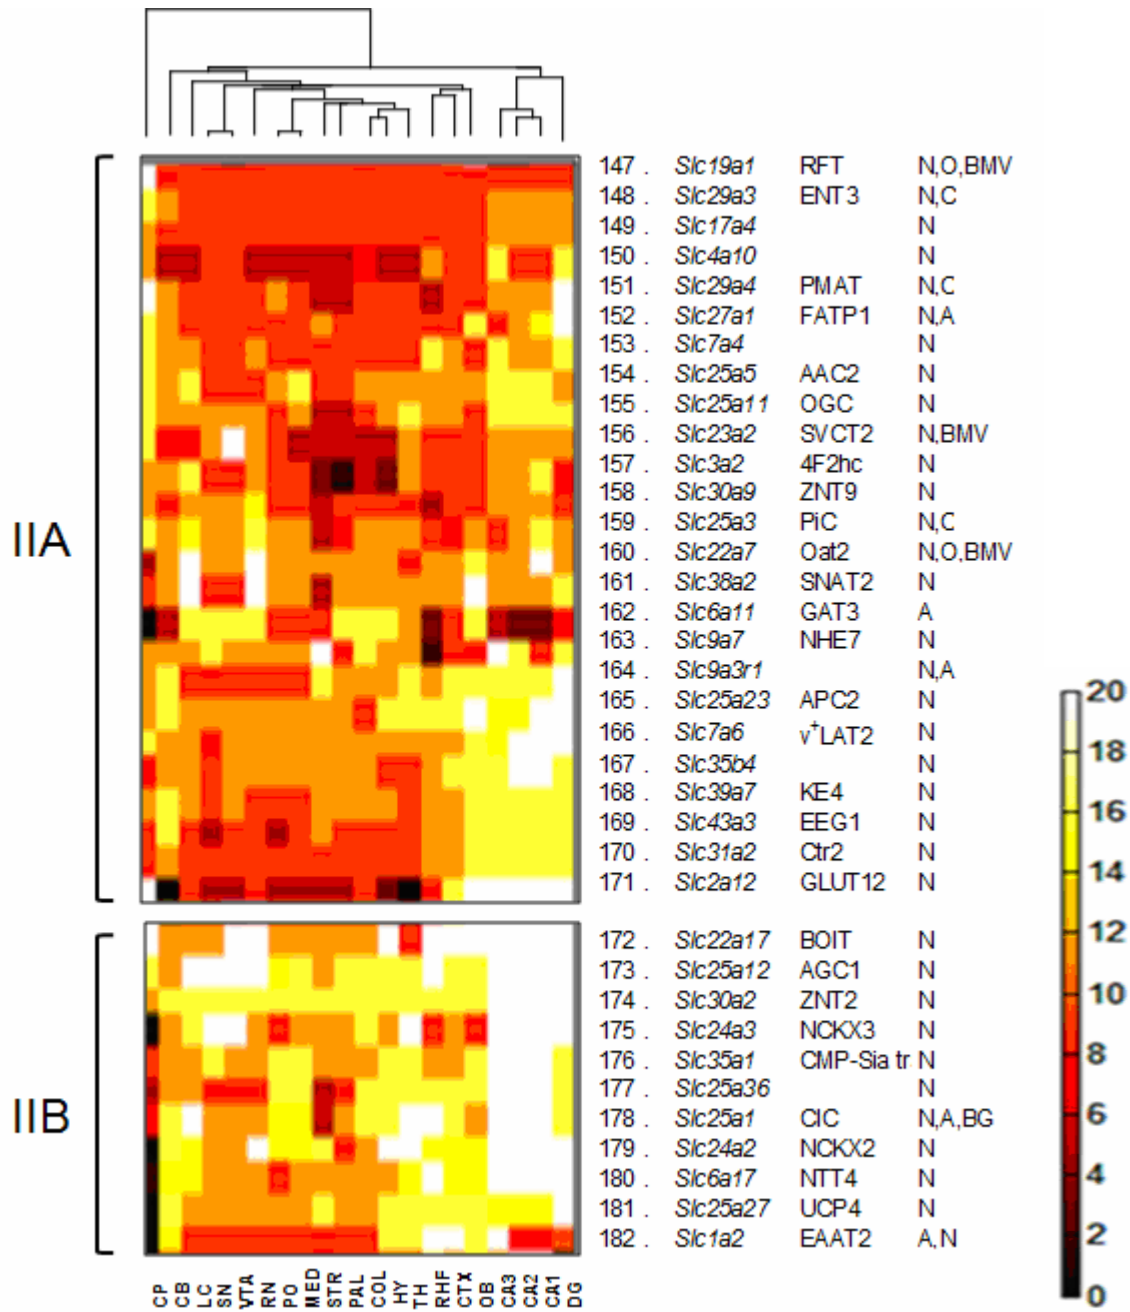

Supplemental Fig. 4

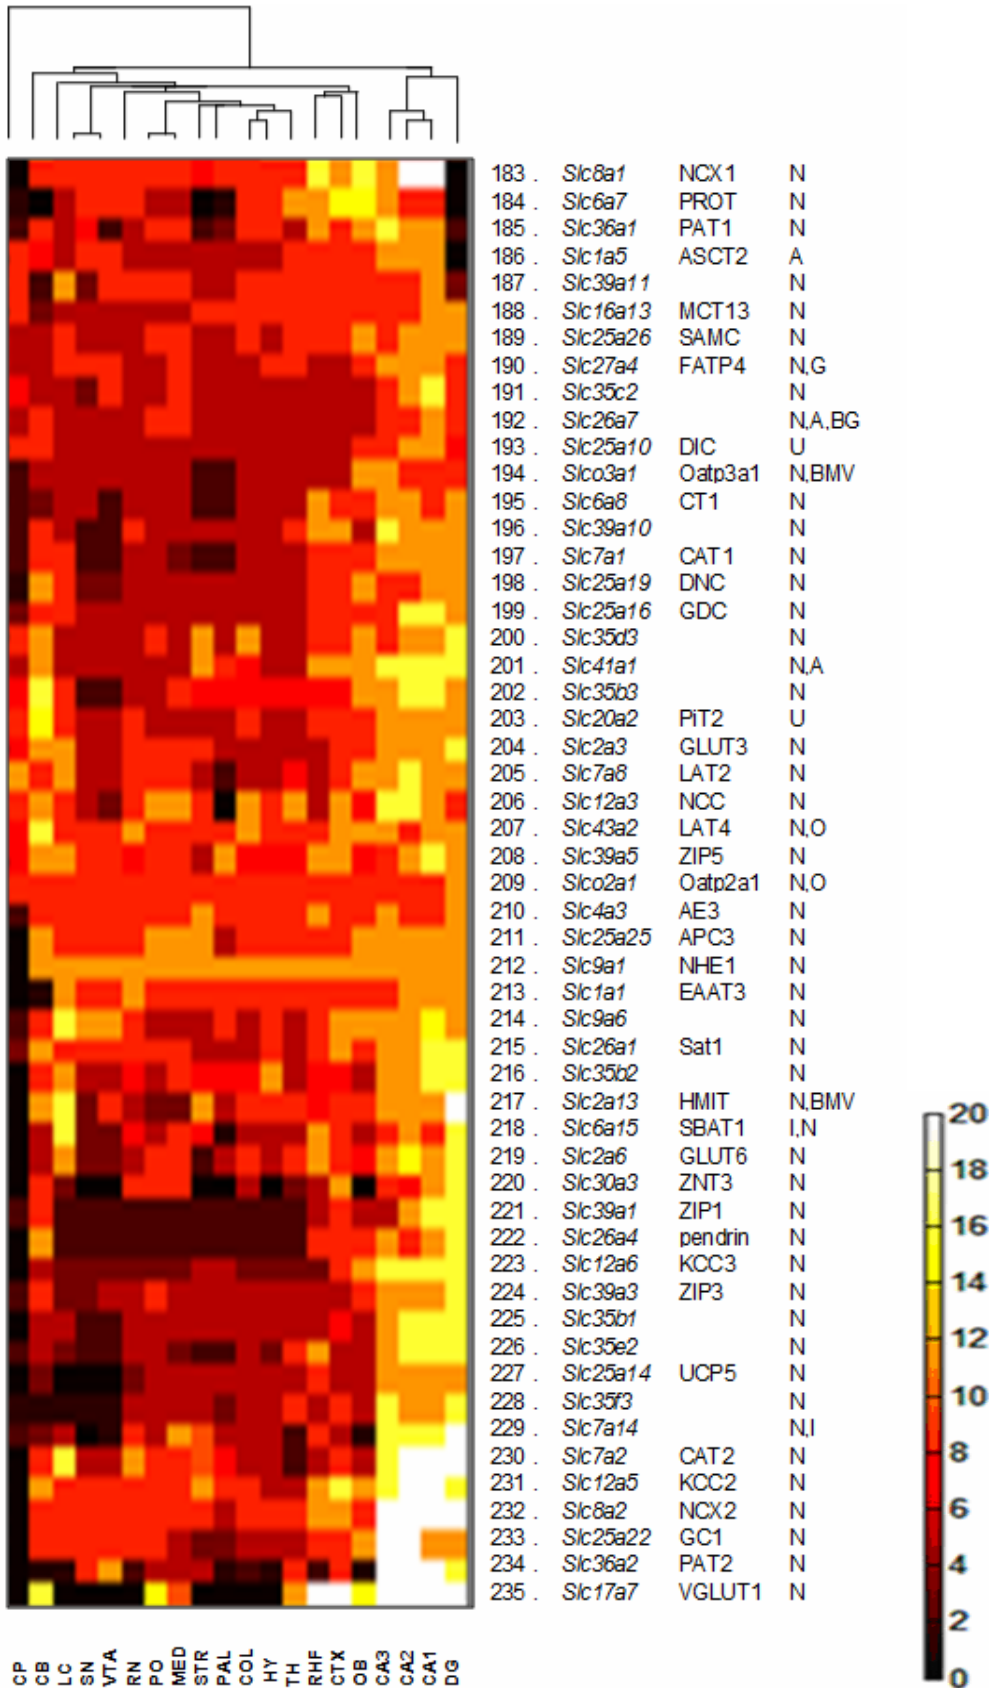

Supplement: 108.149831_1.pdf [file 108.149831_1.pdf]
